# Supplementary material for: Engineering a fidelity-variant live-attenuated vaccine for chikungunya virus
Source: PubMed Central journal article supplement (PMC7560698; doi:10.1038/s41541-020-00241-z), 2020-10-14
Supplement: 41541_2020_241_MOESM2_ESM.pdf [file 41541_2020_241_MOESM2_ESM.pdf]

1 SUPPLEMENTARY FIGURES

2

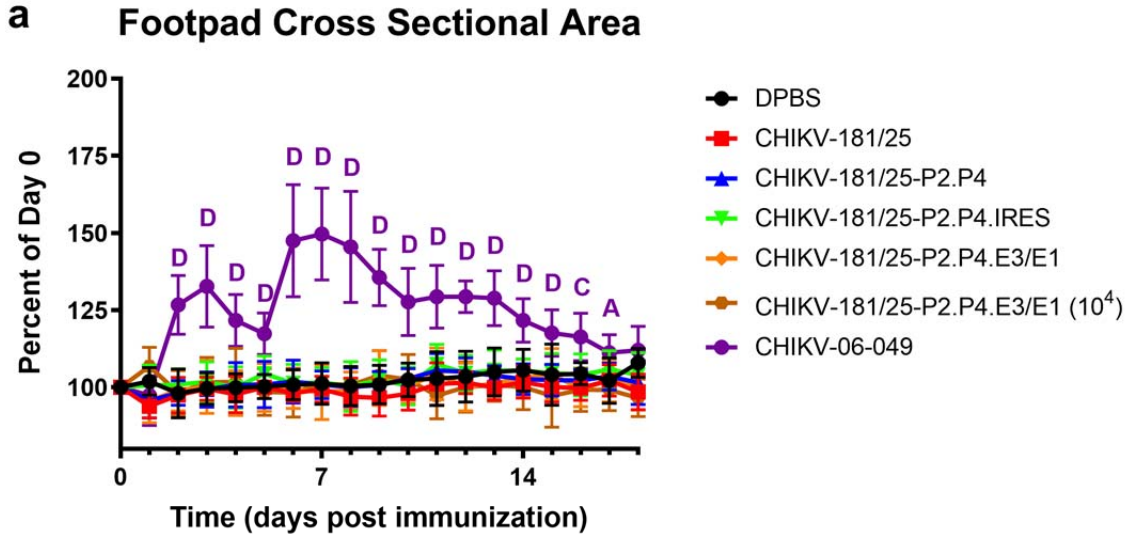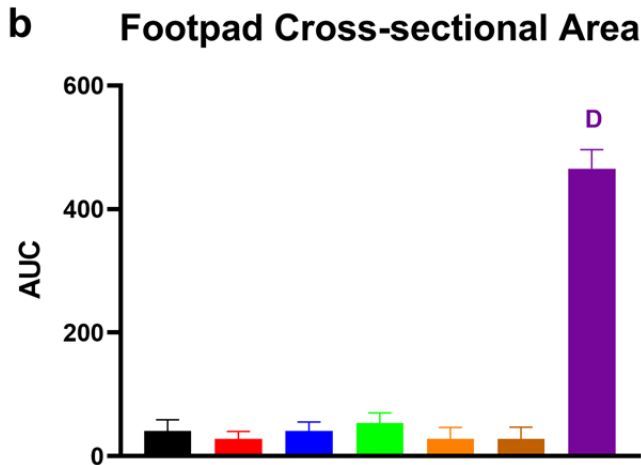

3

4 **Supplementary Figure 1: Ipsilateral footpad swelling associated with LAV CHIKV**  
 5 **immunization.** Adult C57Bl/6J mice were immunized with 10<sup>3</sup> PFU CHIKV LAV derivatives  
 6 unless indicated as 10<sup>4</sup> PFU. Hindlimb footpad cross-sectional area was measured as an ellipse  
 7 once daily for 18 days post inoculation (**a**) and total swelling area under the curve (**b**) are shown  
 8 post immunization. *P* < 0.05 (A), 0.001 (C), 0.0001 (D), 2-Way ANOVA on untransformed  
 9 values, n=5 per experiment, 2 combined experiments. Mean and standard deviation are  
 10 indicated with data points/bars and error bars. AUC=Area Under the Curve.

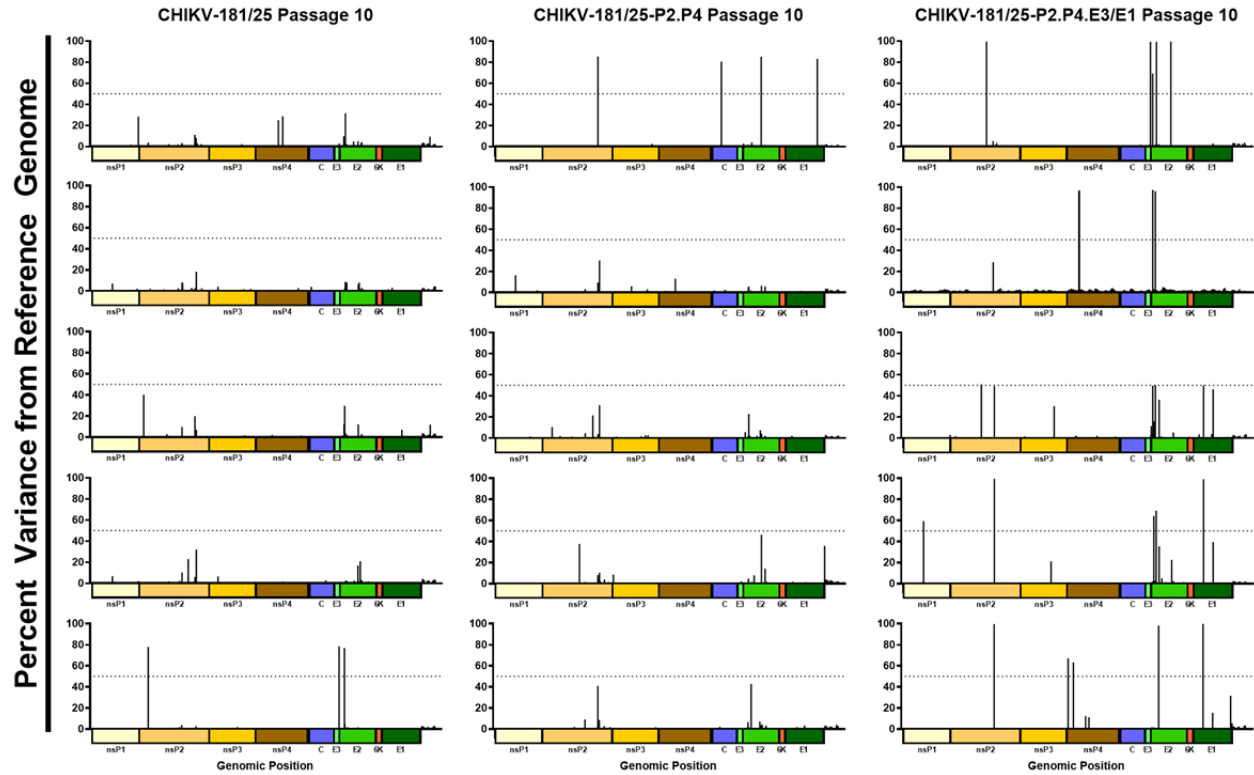

11

12 **Supplementary Figure 2: Mutation accumulation of cell culture-passaged fidelity-variant**  
 13 **CHIKV live-attenuated vaccine candidates.** Positions in genome and frequency of single  
 14 nucleotide polymorphisms acquired over 10 serial passages in BHK-21 cells for each CHIKV  
 15 live-attenuated vaccine are given. Each graph represents a one replicate passage. Dashed line  
 16 is 50% of fragments sequenced, indicating a consensus change for the population. Data are  
 17 percent variance from the reference genome for individual replicates of serially passaged  
 18 CHIKV LAV.

19



26 SUPPLEMENTARY TABLES

27

| Primer Name        | Pool # | Primer Sequence           |
|--------------------|--------|---------------------------|
| CV181-25_1_LEFT    | 1      | GAGACACACGTAGCCTACCAGT    |
| CV181-25_1_RIGHT   | 1      | CGCTTGTAAGTCCCCGATCTTT    |
| CV181-25_2_LEFT**  | 2      | TGTCGGACAGGAAGTACCACTG    |
| CV181-25_2_RIGHT** | 2      | TTGTTCGAGTATGAGGGGTAGGC   |
| CV181-25_3_LEFT    | 1      | ACCACCAGGCGATTAAAGGAGT    |
| CV181-25_3_RIGHT   | 1      | CACACGAAACCACTGTGTCACA    |
| CV181-25_4_LEFT    | 2      | TGTTCTCAGTAGGGTCAACGCT    |
| CV181-25_4_RIGHT   | 2      | ACCACTATCCTCTGGTTCAGCC    |
| CV181-25_5_LEFT    | 1      | CCGGCGACCATTTGTGATCAAA    |
| CV181-25_5_RIGHT   | 1      | GTCCTCAACGGGATTGACAACC    |
| CV181-25_6_LEFT    | 2      | ACAAGAGGCCTGATACCCAGTC    |
| CV181-25_6_RIGHT   | 2      | CACGACGTGGTCTGTTAGTTGG    |
| CV181-25_7_LEFT    | 1      | CGAAATCGACGTGGAACAGCTT    |
| CV181-25_7_RIGHT   | 1      | CCTCACCAGCTCATACGACTCT    |
| CV181-25_8_LEFT    | 2      | AAAGCGCAACGATGGTGTACAA    |
| CV181-25_8_RIGHT   | 2      | CTCTCTGTCTCATCACGTCGGT    |
| CV181-25_9_LEFT    | 1      | GCAAGTCAGCCATTATCAAGAACC  |
| CV181-25_9_RIGHT   | 1      | CAGTGTACACCGCCTGGAGATA    |
| CV181-25_10_LEFT   | 2      | AGCAGTGCGGCTTCTTCAATAT    |
| CV181-25_10_RIGHT  | 2      | GACGTGCTCTGATGTTGATGCA    |
| CV181-25_11_LEFT   | 1      | ACTGCAAATTGACTATCGTGGACA  |
| CV181-25_11_RIGHT  | 1      | TTATCCCCGCTGTTTCGAGGAT    |
| CV181-25_12_LEFT   | 2      | CATCGATAATGGCGGGCATCTG    |
| CV181-25_12_RIGHT  | 2      | TCCTGGTAGTCACGCAGATCTG    |
| CV181-25_13_LEFT   | 1      | TTCGGATTCAACCCTGAGGCAG    |
| CV181-25_13_RIGHT  | 1      | GGTCATACCTACCAAGCGTTGC    |
| CV181-25_14_LEFT   | 2      | TAAGAGAGTCACCTGGGTAGCG    |
| CV181-25_14_RIGHT  | 2      | AGGCTGCATTTCAGTTGATTGTTCA |
| CV181-25_15_LEFT   | 1      | GAAACCACCATGTGTCACCAGT    |
| CV181-25_15_RIGHT  | 1      | CCTTTGCGACTTCTCGATAGGC    |
| CV181-25_16_LEFT   | 2      | CGTATCCAGTAATCCACGCCGT    |
| CV181-25_16_RIGHT  | 2      | TTTTCTGCCTGCCAAGCTACTG    |
| CV181-25_17_LEFT   | 1      | CATACAGATGCGGACCCAAGTG    |
| CV181-25_17_RIGHT  | 1      | TGACATGGTTCATGCGAAGTCG    |
| CV181-25_18_LEFT   | 2      | CAGAAATGCCCGGTGGATGATG    |
| CV181-25_18_RIGHT  | 2      | GTAATGTATGTACCGCCCCGTC    |
| CV181-25_19_LEFT   | 1      | AGTTTGATCTAAGCGCCGATGG    |

|                       |   |                               |
|-----------------------|---|-------------------------------|
| CV181-25_19_RIGHT     | 1 | CCTTCGTCTCGAAGTCCCCAAATG      |
| CV181-25_20_LEFT      | 2 | CAGCTATTTCCCTTCAGGCACC        |
| CV181-25_20_RIGHT     | 2 | GGGTAACACTTCTCCTCGTGGA        |
| CV181-25_21_LEFT      | 1 | GAACTGGTCCAGGCCATTTAC         |
| CV181-25_21_RIGHT     | 1 | ACTCATTACATGCTGCCACTGC        |
| CV181-25_22_LEFT      | 2 | CGACTTATCGGACCATATACCCG       |
| CV181-25_22_RIGHT     | 2 | ACTGCTGAGTCCAAAGTGGGTA        |
| CV181-25_23_LEFT      | 1 | ACCTTCCCCATTCCAGAACA          |
| CV181-25_23_RIGHT     | 1 | CATAGGTACGCTGTTGCCAAGG        |
| CV181-25_24_LEFT      | 2 | CAGTAGATATGAAAAGGATGTGAAGGT   |
| CV181-25_24_RIGHT     | 2 | AATCTCTCCGAAAGCAGCCTCT        |
| CV181-25_25_LEFT      | 1 | GCCAAGATGATTCACCTTGCGCT       |
| CV181-25_25_RIGHT     | 1 | GGAGCTTTCTGGGATACAACACTGC     |
| CV181-25_26_LEFT      | 2 | ACATGGTGTCTCGTCTCCGATGAA      |
| CV181-25_26_RIGHT     | 2 | GCAAAGGTGGCCATGGACATTA        |
| CV181-25_27_LEFT      | 1 | GATGGCAACGAACAGGGCTAAT        |
| CV181-25_27_RIGHT     | 1 | CTGAGATCAGCTGGGCAAGTTG        |
| CV181-25_28_LEFT      | 2 | TTCTACAATAGGAGGTACCAGCCT      |
| CV181-25_28_RIGHT     | 2 | ATCGATGGTCCCCTTTACGTGT        |
| CV181-25_29_LEFT      | 1 | TGCATCTTCGAAGTCAAGCATGA       |
| CV181-25_29_RIGHT     | 1 | TACGGGCTCCTTCATTAGCTCC        |
| CV181-25_30_LEFT*     | 2 | TACAGTACTCAGGAGGCCGGTT        |
| CV181-25_30_RIGHT_V2* | 2 | TGGCTTTATAGACATTGAAGTTGTCC    |
| CV181-25_31_LEFT      | 1 | CGCATGCTAGAAGACAACGTCA        |
| CV181-25_31_RIGHT     | 1 | GCCAGGATGAAGTGTCCCATTG        |
| CV181-25_32_LEFT      | 2 | AATCATATGCCAGCAGACGCAG        |
| CV181-25_32_RIGHT     | 2 | TGTACCGCACCGTCTGACTATT        |
| CV181-25_33_LEFT      | 1 | AGGTACATATGCCCCAGACAC         |
| CV181-25_33_RIGHT     | 1 | TGGTCAGGATACAGCAGCATGA        |
| CV181-25_34_LEFT      | 2 | TCCTCTGGCAAATGTGACATGC        |
| CV181-25_34_RIGHT     | 2 | ATCGACAGGAGTACGAACGAGG        |
| CV181-25_35_LEFT      | 1 | GGCCACCCGCATGAGATAATTT        |
| CV181-25_35_RIGHT     | 1 | CCGACGCTCATTACGGCTAAAA        |
| CV181-25_36_LEFT      | 2 | AACGAGCAGCAGCCTTTGTTTT        |
| CV181-25_36_RIGHT     | 2 | CTCTTGTCCTTGCACTCTGCTG        |
| CV181-25_37_LEFT      | 1 | AGCCAACGCTATCGCTTGATTA        |
| CV181-25_37_RIGHT     | 1 | GTGTCCAGGCTGAAGACATTGG        |
| CV181-25_38_LEFT      | 2 | ACCAAGGAAATAATGTTACTGTATCTGCT |
| CV181-25_38_RIGHT     | 2 | AGTTCATCGCTCTTACCGGGTT        |
| CV181-25_39_LEFT      | 1 | GGCACCATCTGGCTTCAAGTAT        |
| CV181-25_39_RIGHT     | 1 | ACAGACTTGTACGCGGAATTCCG       |

|                       |   |                                |
|-----------------------|---|--------------------------------|
| CV181-25_40_LEFT      | 2 | TAACGCCGTCACTATTCGGGAA         |
| CV181-25_40_RIGHT_V2  | 2 | GGGACACATATACCTTCGTACC         |
| CV181-25_41_LEFT      | 1 | GCAGCACTGATCCTAATCGTGG         |
| CV181-25_41_RIGHT     | 1 | AGCCCTTTGAACTACTTCTGTTTATGG    |
| CV181-25_42_LEFT_V2** | 2 | GAGACACACCATATATAGCTAAGAATCAAT |
| CV181-25_42_RIGHT**   | 2 | ACCTACATCTCTTCCGTTTGCC         |

28

29 **Supplementary Table 1. Primers used for PrimalSeq amplicon-based sequencing of**  
30 **CHIKV-181/25 genomes.** Primers were generated using PrimalScheme wrapper for Primer3  
31 multiplex primer design tool targeting the CHIKV-181/25 full-length genome<sup>47</sup>. Variant (V2)  
32 primers were modified manually to account for gaps in CHIKV-181/25-P2.P4.E3/E1 and regions  
33 of high similarity in conserved repeat elements present in the CHIKV 3'-UTR. All primers were  
34 pooled with equal volumes of 10 µM starting concentration unless noted otherwise (\* 50 µM, \*\*  
35 100 µM).

| <b>Score</b> | <b>Short Description</b>              | <b>Long Description</b>                                                                                                                                                                                                                                                                                                                |
|--------------|---------------------------------------|----------------------------------------------------------------------------------------------------------------------------------------------------------------------------------------------------------------------------------------------------------------------------------------------------------------------------------------|
| <b>0</b>     | none                                  | no lesions observed                                                                                                                                                                                                                                                                                                                    |
| <b>1</b>     | minimal                               | focal or scattered, minimal, subcutaneous inflammation and/or edema not observed in control animals or of questionable significance; could be a background lesion or variation of normal                                                                                                                                               |
| <b>2</b>     | mild                                  | mild inflammation of subcutaneous tissue, fascia, and/or skeletal muscle affecting less than 10% of the soft tissue surrounding tarsus/metatarsus/digit, and/or moderate to severe edema of subcutaneous tissue                                                                                                                        |
| <b>3</b>     | moderate                              | mild to moderate inflammation and edema of subcutaneous tissue, fascia, skeletal muscle, and/or tendon affecting 10-25% of the soft tissue surrounding tarsus/metatarsus/ digit; and/or scattered myocyte necrosis; and/or synovial cell reactive hyperplasia                                                                          |
| <b>4</b>     | severe                                | widespread, severe inflammation and edema of subcutaneous tissue, fascia, skeletal muscle, and/or tendon affecting greater than or equal to 25% of the soft tissue surrounding tarsus/metatarsus/digit, and/or more widespread myocyte necrosis; and/or synovial cell reactive hyperplasia or mild synovial/peri-synovial inflammation |
| <b>5</b>     | severe with evidence of joint lesions | same as "4" but with more severe inflammation; and/or inflammation/necrotic debris in the joint space; and/or lesions affecting articular cartilage or bone                                                                                                                                                                            |

36

37 **Supplementary Table 2: Pathology scoring criteria.**
